# Supplementary material for: Computational design and selection of optimal building blocks and linking topologies for construction of high-performance host materials
Source: Royal Society of Chemistry journal article supplement (doi:10.1039/c2ra21242k), 2012-01-01
Supplement: c2ra21242k.pdf [file c2ra21242k.pdf]

# **Computational Design and Selection of Optimal building blocks and linking topologies for construction of high-performance host materials**

*Ming-Kuan Yan, Ye Tao, Run-Feng Chen\*, Chao Zheng, Zhong-Fu An, Wei Huang\**

Key Laboratory for Organic Electronics & Information Displays (KLOEID), Institute  
of Advanced Materials (IAM), Nanjing University of Posts & Telecommunications  
(NUPT), Nanjing 210046 (China)

\*Corresponding author. Tel: +86 25 8586 6008; Fax: +86 25 8586 6999; E-mail:  
wei-huang@njupt.edu.cn or iamrfchen@njupt.edu.cn.

## **Supporting Information**

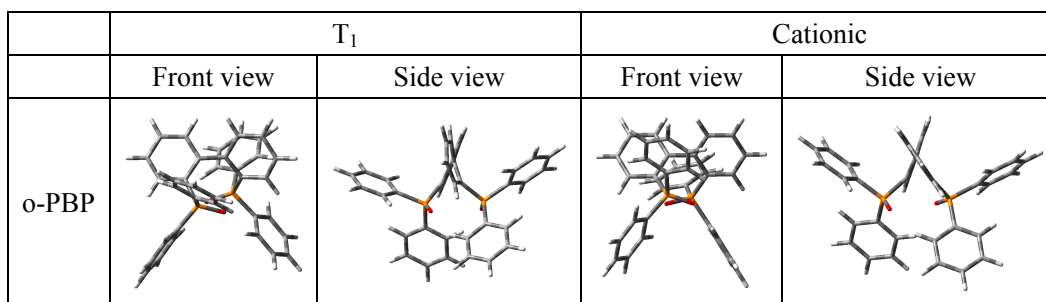

**Fig. S1.** Optimized geometries of *o*-PBP in the lowest triplet ( $T_1$ ) and cationic states using B3LYP/6-31G(d). They are found tortile probably due to the strong interaction of the two oxygen atoms in diphenyl phosphine oxide. The optimized geometry of *o*-PBP in  $T_1$  state using HF/6-31G(d) seems the most reasonable after further trials using other DFT and ab initio methods (*e.g.* BLYP, BP86, B3P86, BPW91, B3PW91, X3LYP, HF and MP2).
